# Supplementary material
Source: PubMed Central journal article supplement (PMC8799808)
Supplement: 12687_2021_554_MOESM1_ESM.pdf [file 12687_2021_554_MOESM1_ESM.pdf]

## **JOURNAL OF COMMUNITY GENETICS**

### **TITLE**

Transgender and gender-diverse (TGD) individuals' perspectives on research seeking genetic variants associated with TGD identities: A qualitative study

### **AUTHORS**

Antoine Rajkovic<sup>1</sup>, Allison L. Cirino<sup>1</sup>, Tala Berro<sup>2</sup>, Diane R. Koeller<sup>3</sup>, and Kimberly Zayhowski<sup>4</sup>

<sup>1</sup>Genetic Counseling Program, MGH Institute of Health Professions, Boston, MA, USA

<sup>2</sup>Division of Genetics, Brigham and Women's Hospital, Boston, MA, USA

<sup>3</sup>Division of Cancer Genetics and Prevention, Dana-Farber Cancer Institute, Boston, MA, USA

<sup>4</sup>Department of Medical Oncology, Boston Medical Center, Boston, MA, USA

### **CORRESPONDING AUTHOR**

Kimberly Zayhowski

kzayhows@bu.edu

## Supplemental Material I: Demographic screening survey

### Survey:

- What is your age?
  - 18-24 years of age
  - 25-34 years of age
  - 35-44 years of age
  - 45-54 years of age
  - 55-64 years of age
  - 65-74 years of age
  - 75 years or older
  - Prefer not to answer
  
- What are your pronouns?
  - *Select all that apply*
  - he/him/his
  - she/her/hers
  - they/them/theirs
  - zie/zim/zier
  - Other (please specify):
  - Prefer not to answer
  
- How do you describe your gender identity? (i.e. Your personal concept of self as male, female, a blend of both or neither – how you perceive yourself and what you call yourself.)
  - **Non-binary and/or genderqueer:** a spectrum of gender identities that are not exclusively masculine or feminine —identities that are outside the gender binary.
  - **Transgender:** people who have a gender identity or gender expression that differs from the sex that they were assigned at birth.
  - **Agender:** also called genderless, gender-free, non-gendered, or ungendered, are those who identify as having no gender or being without a gender identity.
  - **Pangender:** a person whose gender identity is not limited to one gender and may encompass all genders at once.
  - **Two Spirit:** an umbrella term used by some Indigenous North Americans to describe Native people in their communities who fulfill a traditional third-gender ceremonial and social role in their cultures.
  - **Hijra:** a term used in some South Asian countries, meaning someone is neither completely male nor female, and which typically refers to transwomen.
  - **Questioning:** Someone in the process of exploring and discovering one’s own sexual orientation, gender identity, or gender expression.
    - *Select all that apply*
    - Man
    - Woman
    - Genderqueer
    - Non-binary

- Transgender
  - Agender
  - Pangender
  - Two Spirit
  - Hijra
  - Questioning
  - Other (please specify)
  - Prefer not to answer
- What sex were you assigned at birth?
- Male
  - Female
  - Intersex (any variation in sex characteristics including: chromosomes, gonads, sex hormones or genitals that do not fit the typical definitions for male or female bodies)
  - Other (please specify)
  - Prefer not to answer
- How do you describe your sexual orientation?
- *Select all that apply*
  - **Straight:** a person who is generally attracted to the "other" gender within a binary system.
  - **Gay:** a person who is generally attracted to their same gender, typically referring to those who identify as a man
  - **Lesbian:** a person who is generally attracted to their same gender, typically referring to those who identify as a woman.
  - **Bisexual:** a person attracted to both men and women, though not necessarily equally or at the same time.
  - **Asexual:** describes someone not sexually attracted to any gender.
  - **Pansexual:** describes a person attracted to those of any gender or who does not care about gender when selecting sexual partners.
  - **Queer:** a broad term that some individuals prefer, and that can be used to refer to the range of non-heterosexual and non-cisgender people.
  - **Questioning:** a person in the process of exploring and discovering one's own sexual orientation, gender identity, or gender expression.
  - Other (please specify)
  - Prefer not to answer
- How do you describe your race or ethnicity?
- *Select all that apply*
  - African American or Black
  - Native American/ Alaska Native/ First Nations/ Indigenous
  - East/Southeast Asian
  - South Asian
  - Middle Eastern/ North African/ West Asian
  - Native Hawaiian / Pacific Islander

- White /Caucasian
- Other (please describe)
- Prefer not to answer
  
- Are you of Hispanic, Latinx, or Spanish origin?
  - No
  - Yes, Mexican, Mexican Am., Chicano
  - Yes, Puerto Rico
  - Yes, Cuban
  - Yes, another Hispanic, Latinx, or Spanish Origin, for example, Salvadoran, Dominican, Colombian, Guatemalan, Spaniard, Ecuadorian, etc (Please describe)
  
- What is your highest level of education or grade level achieved?
  - Elementary school (K-5)
  - Middle school (6-8)
  - High school (9-12)
  - Some college or secondary education
  - Associate's degree
  - Bachelor's degree
  - Graduate school and/or professional degree
  - Other (please describe):
  
- How would you describe your baseline knowledge of biology and genetics?
  - None
  - Some in high school
  - Some in college (non-major)
  - College (major-related)
  - Graduate coursework.
  - Doctorate coursework
  - Professional education/training/career.
  - Other (please describe):
  
- How did you hear about this study (i.e. which specific Facebook group, Reddit subreddit, or Twitter thread)?
  - (Free response)
